# Supplementary material
Source: MDPI journal article supplement (https://www.mdpi.com/1996-1073/14/15/4619)
Supplement: s1 [file s1]

# Thermal properties and combustion related problems prediction of agricultural crop residues

Xuejun Qian <sup>1,2,\*</sup>, Jingwen Xue <sup>3</sup>, Yulai Yang <sup>1,2</sup>, and Seong W. Lee <sup>1,2</sup>

<sup>1</sup> Industrial and Systems Engineering Department, Morgan State University, 1700 East Cold Spring Lane, Baltimore, MD 21251, USA

<sup>2</sup> Center for Advanced Energy Systems and Environmental Control Technologies, School of Engineering, Morgan State University, 1700 East Cold Spring Lane, Baltimore, MD 21251, USA

<sup>3</sup> Civil Engineering Department, School of Engineering, Morgan State University, 1700 East Cold Spring Lane, Baltimore, MD 21251, USA

\* Correspondence: [xuqia1@morgan.edu](mailto:xuqia1@morgan.edu) (X. Q.); Tel.: +1-443-885-2772

## Supplemental Materials

Table S1. Fuel and Ash Analysis along with HHV Results of Agricultural Crop Residues

| No. | Type | C (wt%) | H (wt%) | O (wt%) | N (wt%) | S (wt%)    | Cl (wt%)   | Ash (wt%) | K (mg/kg) | Na (mg/kg) | Si (mg/kg) | P (mg/kg) | Ca (mg/kg) | Mg (mg/kg) | HHV (MJ/kg)                | Reference          |
|-----|------|---------|---------|---------|---------|------------|------------|-----------|-----------|------------|------------|-----------|------------|------------|----------------------------|--------------------|
| 1   | WS   | 46.60   | 6.00    | -       | 0.40    | 913 mg/kg  | 2300 mg/kg | 4.5       | 6970      | 201        | 11100      | 385       | 3010       | 688        | -                          | Sommersacher, 2013 |
| 2   | WS   | 44.90   | 5.60    | -       | 0.60    | 1485 mg/kg | 3046 mg/kg | 6.6       | 6629      | 282.9      | 17618      | 442       | 3785       | 945        | -                          | Sommersacher, 2013 |
| 3   | WS   | 27.30   | 49.00   | 22.14   | 0.47    | 0.04       | 0.0542     | -         | 0.19%     | 0.04%      | 0.65%      | 0.01%     | 0.03%      | 0.04%      | -                          | Blander, 1997      |
| 4   | WS   | 40.67   | 4.89    | 35.56   | 0.49    | 0.11       | 0.1        | 5.08      | 35219     | -          | -          | -         | 28517      | 7245       | 16.03 (HHV), 14.64 (LHV)   | Bradna, 2016       |
| 5   | WS   | 51.67   | 6.21    | 40.45   | 1.44    | 0.23       | 8.25%      | 14.8      | 20.90%    | 0.60%      | 53.00%     | 2.78%     | 7.46%      | 3.59%      | -                          | Xue, 2020          |
| 6   | WS   | 44.80   | 5.51    | 40.20   | 0.65    | 0.05       | 0.31       | 5.2       | 6700      | -          | -          | 0.05%     | -          | -          | 17.7 (HHV), 16.4 (LHV)     | Pesenjanski, 2016  |
| 7   | WS   | 44.92   | 5.46    | 41.77   | 0.44    | 0.16       | 0.23       | 7.02      | 25.60%    | 1.71%      | 55.32%     | 1.26%     | 6.14%      | 1.06%      | 17.94 (HHV)                | Jekins, 1998       |
| 8   | WS   | 44.80   | 7.01    | -       | 0.56    | 0.17       | -          | 6.04      | 1.75%     | 0.06%      | 3.01%      | -         | 0.27%      | 0.13%      | -                          | Li, et al., 2007   |
| 9   | WS   | 41.31   | 5.78    | 50.98   | -       | 0.72       | 1.78%      | 13.65     | 16.12%    | -          | 33.37%     | 4.23%     | 20.68%     | 8.50%      | -                          | Wang, 2018         |
| 10  | WS   | 39.99   | 5.15    | 38.96   | 0.30    | 0.10       | -          | 2.688     | 56.07%    | 3.99%      | 2.08%      | 14.11%    | 14.87%     | 4.35%      | 21.156(HHV), 18.31 (LHV)   | Zhang, 2014        |
| 11  | WS   | 49.00   | 5.94    | 43.70   | 0.77    | 0.17       | 0.544      | 7.1       | -         | -          | -          | -         | -          | -          | 19.555 (HHV), 18.181 (LHV) | Bakker, 2013       |
| 12  | WS   | 45.70   | 6.00    | 40.90   | 1.40    | 0.16       | 0.74       | 5.8       | 1.51      | 0.07       | 1.29       | 0.13      | 0.23       | 0.06       | 18.4 (HHV)                 | Trinh, 2013        |
| 13  | WS   | 37.20   | 5.57    | 37.30   | 1.14    | 0.20       | -          | 17.04     | -         | -          | -          | -         | -          | -          | 14.86 (HHV)                | Montero, 2016      |

|    |    |       |      |       |      |      |           |       |            |           |           |           |           |           |                            |                  |
|----|----|-------|------|-------|------|------|-----------|-------|------------|-----------|-----------|-----------|-----------|-----------|----------------------------|------------------|
| 14 | WS | 45.50 | 5.10 | 34.10 | 1.80 | -    | -         | 13.5  | -          | -         | -         | -         | -         | -         | 17.0 (HHV)                 | Demirbas, 1997   |
| 15 | WS | 41.60 | 6.10 | 52.10 | 0.14 | 0.06 | -         | 1.3   | -          | -         | -         | 14381ppm  | -         | 22534ppm  | 20.3 (HHV)                 | Naik, 2010       |
| 16 | WS | 42.95 | 5.35 | 46.99 | -    | -    | -         | 6.9   | -          | -         | -         | -         | -         | -         | 17.99 (HHV)                | Yin, 2011        |
| 1  | RS | 43.30 | 6.00 | 39.10 | 0.40 | 0.20 | 83.6 g/kg | -     | 230.7 g/kg | 3.5 g/kg  | -         | 14.8 g/kg | 18.6 g/kg | 21.4 g/kg | 17.249 (HHV), 15.931 (LHV) | Baetge, 2018     |
| 2  | RS | 45.10 | 6.20 | 32.10 | 0.60 | 0.30 | 57.3 g/kg | -     | 226.5 g/kg | 13.3 g/kg | -         | 20.1 g/kg | 39.4 g/kg | 11.6 g/kg | 17.330 (HHV), 15.968 (LHV) | Baetge, 2018     |
| 3  | RS | 38.24 | 5.20 | 36.26 | 0.87 | 0.18 | 0.58      | 18.67 | 12.30%     | 0.96%     | 74.67%    | 1.41%     | 3.01%     | 1.75%     | 15.09 (HHV)                | Jekins, 1998     |
| 4  | RS | 49.50 | 6.20 | 41.50 | 0.20 | 0.10 | 0.02      | 0.4   | 0.05%      | 1.90%     | 75%       | 2.70%     | 1.50%     | 1.90%     | 18.0 (HHV)                 | Liu et al., 2011 |
| 5  | RS | 40.30 | 5.10 | 45.10 | 0.50 | 0.09 | 0.61      | 15    | 15.30%     | 0.40%     | 69.90%    | 1.50%     | 3.50%     | 1.60%     | 14.7 (LHV)                 | Skrifvars, 2005  |
| 6  | RS | 48.70 | 5.92 | 44.20 | 1.05 | 0.14 | 0.49      | 18.0  | -          | -         | -         | -         | -         | -         | 18.824(HHV), 17.511 (LHV)  | Bakker, 2013     |
| 7  | RS | 37.19 | 4.80 | 57.60 | 0.20 | 0.30 | -         | 6.9   | -          | -         | -         | -         | -         | -         | 12.3 (HHV)                 | Nizamuddin, 2019 |
| 8  | RS | 44.40 | 7.40 | 47.07 | 1.13 | 0.00 | -         | 13.3  | 19350.0    | 860.8%    | 39310     | 940.6     | 4917      | 4074      | 15.03 (HHV), 13.58 (LHV)   | Duan, 2015       |
| 9  | RS | 33.70 | 3.91 | 36.26 | 0.71 | 0.03 | 0.3       | 13.3  | -          | -         | -         | -         | -         | -         | 14.08 (HHV)                | Hung, 2020       |
| 10 | RS | 46.24 | 6.21 | 46.23 | 1.32 | -    | -         | -     | -          | -         | -         | -         | -         | -         | 16.16 (HHV)                | Huang, 2012      |
| 11 | RS | 28.55 | 3.98 | 65.71 | 1.15 | 0.61 | -         | 20.0  | -          | -         | -         | -         | -         | -         | 13.48 (HHV)                | Danish, 2015     |
| 12 | RS | 42.04 | 6.26 | 39.00 | 1.23 | 0.64 | -         | 10.83 | 38.92%     | 2.16%     | 44.72%    | 1.63%     | 9.23%     | 1.96%     | 19.441 (LHV)               | Okasha, 2007     |
| 13 | RS | 42.57 | 5.84 | 49.33 | 2.13 | 0.13 | 0.6       | 9.2   | 1.131wt %  | 0.540wt % | 2.082wt % | -         | 0.12wt %  | 0.068wt % | -                          | Kai, 2019        |
| 14 | RS | 41.25 | 5.59 | 36.71 | 1.12 | 0.16 | 10.63 %   | 9.6   | 34.55%     | 5.81%     | 39.28%    | 1.73%     | 0.85%     | 3.76%     | -                          | Pan, 2020        |
| 15 | RS | 41.15 | 6.93 | 50.71 | 0.97 | 0.24 | 0.39      | 15.6  | 1.13wt%    | 0.05wt%   | 2.29wt%   | 0.21wt%   | 3.4wt%    | 0.12wt%   | -                          | Xue, 2017        |
| 16 | RS | 47.92 | 6.27 | 44.38 | 1.17 | 0.26 | 0.34      | 13.9  | 2.26wt%    | -         | 4.14wt%   | 0.10wt%   | 0.64wt %  | 0.21wt%   | -                          | Zhang, 2012      |
| 17 | RS | 39.01 | 6.59 | -     | 0.64 | -    | -         | 16.81 | -          | -         | -         | -         | -         | -         | 14.17 (HHV)                | Said,2013        |
| 18 | RS | 40.64 | 6.80 | -     | 0.40 | -    | -         | 15.52 | -          | -         | -         | -         | -         | -         | 14.67 (HHV)                | Said,2013        |
| 19 | RS | 37.74 | 6.49 | -     | 1.23 | -    | -         | 18.66 | -          | -         | -         | -         | -         | -         | 14.06 (HHV)                | Said,2013        |
| 20 | RS | 41.24 | 6.99 | -     | 0.63 | -    | -         | 13.25 | -          | -         | -         | -         | -         | -         | 14.96 (HHV)                | Said,2013        |
| 1  | RH | 38.83 | 4.75 | 35.47 | 0.52 | 0.05 | 0.12      | 20.26 | 3.71%      | 0.21%     | 91.42%    | 0.43%     | 3.21%     | 0.01%     | 15.84(HHV)                 | Jenkins, 1998    |
| 2  | RH | 42.80 | 6.20 | 37.00 | 0.70 | 0.20 | 7.9 g/kg  | -     | 35.0 g/kg  | 2.7 g/kg  | -         | 10.4 g/kg | 14.2 g/kg | 6.3 g/kg  | 17.920 (HHV), 16.558 (LHV) | Baetge, 2018     |

|    |    |       |      |       |      |      |           |        |           |          |        |           |           |          |                            |                 |
|----|----|-------|------|-------|------|------|-----------|--------|-----------|----------|--------|-----------|-----------|----------|----------------------------|-----------------|
| 3  | RH | 41.10 | 6.00 | 39.80 | 0.40 | 0.30 | 10.9 g/kg | -      | 35.1 g/kg | 2.4 g/kg | -      | 58.1 g/kg | 11.0 g/kg | 9.2 g/kg | 17.517 (HHV), 16.199 (LHV) | Baetge, 2018    |
| 4  | RH | 43.50 | 6.00 | 37.80 | 0.40 | 0.20 | 6.9 g/kg  | -      | 30.1 g/kg | 2.5 g/kg | -      | 7.6 g/kg  | 10.8 g/kg | 6.0 g/kg | 17.774 (HHV), 16.456 (LHV) | Baetge, 2018    |
| 5  | RH | 40.10 | 4.70 | 54.50 | 0.50 | 0.05 | 0.06      | 19.7   | 1.85%     | 0.01%    | 95.65% | 0.55%     | 0.50%     | 0.30%    | 15.5 (LHV)                 | Skrifvars, 2005 |
| 6  | RH | 40.23 | 5.23 | 37.51 | -    | -    | -         | 15.1   | -         | -        | -      | -         | -         | -        | 15.2 (HHV)                 | Shen, 2012      |
| 7  | RH | 39.09 | 5.44 | 29.69 | 0.50 | 0.05 | -         | 13.150 | 1.00%     | 2.14%    | 92.92% | 0.34%     | 0.22%     | 0.24%    | 17.42 (HHV)                | Park, 2005      |
| 8  | RH | 38.24 | 5.56 | 32.13 | 0.37 | 0.04 | -         | 13.500 | 0.85%     | 0.87%    | 86.21% | 0.29%     | 0.27%     | 0.27%    | 17.51(HHV)                 | Park, 2005      |
| 9  | RH | 37.77 | 5.29 | 31.66 | 0.31 | 0.02 | -         | 15.440 | 0.99%     | 1.06%    | 90.55% | 0.31%     | 0.28%     | 0.28%    | 16.52 (HHV)                | Park, 2005      |
| 10 | RH | 37.31 | 5.58 | 30.08 | 0.27 | 0.00 | -         | 17.110 | 0.63%     | 0.40%    | 87.88% | 0.19%     | 0.30%     | 0.21%    | 16.31 (HHV)                | Park, 2005      |
| 11 | RH | 36.75 | 5.45 | 31.18 | 0.37 | 0.03 | -         | 16.440 | 0.87%     | 0.94%    | 87.60% | 0.27%     | 0.28%     | 0.28%    | 16.25 (HHV)                | Park, 2005      |
| 12 | RH | 36.61 | 5.43 | 34.23 | 0.34 | 0.03 | -         | 13.340 | 0.77%     | 0.40%    | 87.39% | 0.18%     | 0.20%     | 0.16%    | 16.6 (HHV)                 | Park, 2005      |
| 13 | RH | 32.74 | 5.84 | 37.16 | 0.32 | 0.02 | -         | 13.480 | 0.76%     | 0.71%    | 89.92% | 0.32%     | 0.28%     | 0.29%    | 15.98 (HHV)                | Park, 2005      |
| 14 | RH | 38.27 | 5.74 | 30.20 | 0.29 | 0.02 | -         | 15.650 | 0.83%     | 0.54%    | 90.96% | 0.21%     | 0.39%     | 0.30%    | 16.68 (HHV)                | Park, 2005      |
| 15 | RH | 38.50 | 5.20 | 34.61 | 0.45 | -    | -         | 21.240 | -         | -        | -      | -         | -         | -        | 14.69 (HHV)                | Yin, 2011       |
| 16 | RH | 38.20 | 5.60 | 33.70 | -    | -    | -         | 22.500 | -         | -        | -      | -         | -         | -        | 16.47 (HHV)                | Yin, 2011       |
| 17 | RH | 38.20 | 3.15 | 41.38 | 0.89 | 0.19 | -         | 16.2   | 2%        | -        | 96%    | -         | 1%        | 0%       | 11.66 (LHV)                | Yang, 2017      |
| 18 | RH | 42.30 | 6.10 | 37.50 | 1.10 | 0.04 | 0.2       | 12.8   | 5.4%      | 0.2%     | 87.7%  | 3.7%      | 1.3%      | 0.8%     | 15.0 (LHV), 16.3 (HHV)     | Armesto, 2002   |
| 1  | CS | 43.11 | 5.73 | 42.42 | 0.92 | 0.31 | -         | 7.51   | 14682     | 334      | -      | -         | 5980      | 4173     | 17.19 (HHV)                | Zhang, 2018     |
| 2  | CS | 44.79 | 5.48 | 44.30 | 0.34 | 0.04 | 0.06      | 2.1    | -         | -        | -      | -         | -         | -        | 18.49 (HHV)                | Poudel, 2014    |
| 3  | CS | 43.56 | 5.86 | 46.35 | 1.14 | 0.35 | -         | -      | 15283     | 2028     | -      | 1.02      | 4600      | 4100     | -                          | Lu, 2014        |
| 4  | CS | 44.16 | 5.85 | 45.99 | 1.18 | 0.37 | -         | -      | 12615     | 1706     | -      | 3.08      | 3700      | 2700     | -                          | Lu, 2014        |
| 5  | CS | 39.15 | 5.88 | 49.44 | 1.61 | 0.38 | -         | -      | 17333     | 1450     | -      | 2.4       | 6700      | 4200     | -                          | Lu, 2014        |
| 6  | CS | 48.90 | 6.01 | 44.40 | 0.61 | 0.05 | 0.41      | 6.6    | 18.89%    | -        | 43.04% | 0.57%     | 12.36%    | 7.96%    | 18.06 (HHV), 16.84 (LHV)   | Danje, 2011     |
| 7  | CS | 47.40 | 5.01 | 38.09 | 0.77 | 0.31 | -         | 8.18   | -         | -        | -      | -         | -         | -        | 18.45 (HHV)                | Kumar, 2008     |

|    |    |       |      |       |      |      |             |      |         |       |        |       |        |       |                             |                   |
|----|----|-------|------|-------|------|------|-------------|------|---------|-------|--------|-------|--------|-------|-----------------------------|-------------------|
| 8  | CS | 44.73 | 5.87 | 40.44 | 0.60 | 0.07 | 0.64        | 7.65 | 16.10%  | 0.14% | 36.70% | 2.10% | 12.80% | 3.90% | 17.68 (HHV),<br>16.4 (LHV)  | Masia, 2007       |
| 9  | CS | 43.70 | 5.56 | 43.30 | 0.61 | 0.01 | 0.6         | 5.6  | -       | -     | -      | -     | -      | -     | -                           | Kumar, 2008       |
| 10 | CS | 39.81 | 5.08 | 47.37 | 0.94 | 0.23 | 12.68<br>%  | 6.58 | 46.73%  | -     | 18.18% | 7.55% | 7.12%  | 4.59% | 13.49(LHV)                  | Yang, 2017        |
| 11 | CS | 45.48 | 5.52 | 41.52 | 0.69 | 0.04 | 984<br>ug/g | 6.73 | 20.22%  | 1.47% | 54.12% | 1.97% | 5.61%  | 4.22% | 17.93 (HHV),<br>16.73 (LHV) | Morey, 2009       |
| 12 | CS | 45.70 | 6.00 | 42.00 | 0.60 | 0.09 | 0.36        | 5.3  | 8100    | 120   | 8300   | 690   | 3500   | 3700  | 18.12 (HHV),<br>16.82 (LHV) | Xiong, 2008       |
| 13 | CS | 41.09 | 6.85 | -     | 1.62 | 0.20 | -           | 3.85 | 1.85wt% | 0.08% | 2.49%  | -     | 0.50%  | 0.50% | -                           | Li, et al., 2007  |
| 14 | CS | 33.52 | 5.67 | 54.69 | 0.52 | 0.07 | -           | 5.53 | -       | -     | -      | -     | -      | -     | 17.31 (HHV)                 | Tumuluru,<br>2012 |
| 15 | CS | 43.92 | 6.01 | 40.44 | 0.42 | 0.07 | -           | 5.13 | -       | -     | -      | -     | -      | -     | 17.31 (HHV)                 | Tumuluru,<br>2015 |

Note: WS = wheat straw, RS = rice straw, RH = rice husk, CS = corn stalk, HHV = Higher Heating Value, LHV = Lower Heating Value.

## Reference

- Armesto, L., Bahillo, A., Veijonen, K., Cabanillas, A., & Otero, J. (2002). Combustion behaviour of rice husk in a bubbling fluidised bed. *Biomass and Bioenergy*, 23(3), 171-179.
- Baetge, S., & Kaltschmitt, M. (2018). Rice straw and rice husks as energy sources—comparison of direct combustion and biogas production. *Biomass Conversion and Biorefinery*, 8(3), 719-737.
- Bakker, R. R. C., Elbersen, H. W., Poppens, R. P., & Lesschen, J. P. (2013). *Rice straw and wheat straw-potential feedstocks for the biobased economy*. NL Agency.
- Blander, M., & Pelton, A. D. (1997). The inorganic chemistry of the combustion of wheat straw. *Biomass and Bioenergy*, 12(4), 295-298.
- Bradna, J., Malafák, J., & Hájek, D. (2016). The properties of wheat straw combustion and use of fly ash as a soil amendment. *Agronomy Research*, 14(4), 1257-1265.
- Danish, M., Naqvi, M., Farooq, U., & Naqvi, S. (2015). Characterization of South Asian agricultural residues for potential utilization in future 'energy mix'. *Energy Procedia*, 75, 2974-2980.
- Danje, S. (2011). *Fast pyrolysis of corn residues for energy production* (Doctoral dissertation, Stellenbosch: Stellenbosch University).
- Demirbaş, A. (1997). Calculation of higher heating values of biomass fuels. *Fuel*, 76(5), 431-434.
- Duan, F., Chyang, C. S., Zhang, L. H., & Yin, S. F. (2015). Bed agglomeration characteristics of rice straw combustion in a vortexing fluidized-bed combustor. *Bioresource technology*, 183, 195-202.
- Huang, Y. F., Chen, W. R., Chiueh, P. T., Kuan, W. H., & Lo, S. L. (2012). Microwave torrefaction of rice straw and pennisetum. *Bioresource technology*, 123, 1-7.
- Jenkins, B., Baxter, L. L., Miles Jr, T. R., & Miles, T. R. (1998). Combustion properties of biomass. *Fuel processing technology*, 54(1-3), 17-46.
- Kai, X., Meng, Y., Yang, T., Li, B., & Xing, W. (2019). Effect of torrefaction on rice straw physicochemical characteristics and particulate matter emission behavior during combustion. *Bioresource technology*, 278, 1-8.
- Kumar, A., Wang, L., Dzenis, Y. A., Jones, D. D., & Hanna, M. A. (2008). Thermogravimetric characterization of corn stover as gasification and pyrolysis feedstock. *Biomass and Bioenergy*, 32(5), 460-467.

- Li, X., Wang, S., Duan, L., Hao, J., Li, C., Chen, Y., & Yang, L. (2007). Particulate and trace gas emissions from open burning of wheat straw and corn stover in China. *Environmental Science & Technology*, 41(17), 6052-6058.
- Liu, Z., Xu, A., & Long, B. (2011). Energy from combustion of rice straw: status and challenges to China. *Energy and Power Engineering*, 3(03), 325.
- Lu, W., Ronghou, L., Chen, S., Wenfei, C., Yiwei, T., Renzhan, Y., & Yuanfei, M. (2014). Classification and comparison of physical and chemical properties of corn stalk from three regions in China. *International Journal of Agricultural and Biological Engineering*, 7(6), 98-106.
- Masiá, A. T., Buhre, B. J. P., Gupta, R. P., & Wall, T. F. (2007). Characterising ash of biomass and waste. *Fuel Processing Technology*, 88(11-12), 1071-1081.
- Montero, G., Coronado, M. A., Torres, R., Jaramillo, B. E., García, C., Stoytcheva, M., ... & Valenzuela, E. (2016). Higher heating value determination of wheat straw from Baja California, Mexico. *Energy*, 109, 612-619.
- Morey, R. V., Hatfield, D. L., Sears, R., Haak, D., Tiffany, D. G., & Kaliyan, N. (2009). Fuel properties of biomass feed streams at ethanol plants. *Applied Engineering in Agriculture*, 25(1), 57-64.
- Naik, S., Goud, V. V., Rout, P. K., Jacobson, K., & Dalai, A. K. (2010). Characterization of Canadian biomass for alternative renewable biofuel. *Renewable energy*, 35(8), 1624-1631.
- Nizamuddin, S., Qureshi, S. S., Baloch, H. A., Siddiqui, M. T. H., Takkalkar, P., Mubarak, N. M., ... & Tanksale, A. (2019). Microwave hydrothermal carbonization of rice straw: Optimization of process parameters and upgrading of chemical, fuel, structural and thermal properties. *Materials*, 12(3), 403.
- Okasha, F. (2007). Staged combustion of rice straw in a fluidized bed. *Experimental Thermal and Fluid Science*, 32(1), 52-59.
- Pan, Z., Zhang, S., Liu, X., Zhang, H., & Zhu, S. (2020). Effect of Sludge-Based Additive on Ash Characteristic and Potassium Fixation during the Rice Straw Combustion Process. *Energy & Fuels*, 34(3), 3367-3375.
- Park, S. J., Kim, M. H., & Shin, H. M. (2005). Chemical compositions and thermal characteristics of rice husk and rice husk ash in Korea. *Journal of Biosystems Engineering*, 30(4), 235-241.
- Pešenjanski, I., Miljković, B., & Vićević, M. (2016). Pyrolysis kinetic modelling of wheat straw from the Pannonian region. *Journal of Combustion*, 2016.
- Poudel, J., & Oh, S. C. (2014). Effect of torrefaction on the properties of corn stalk to enhance solid fuel qualities. *Energies*, 7(9), 5586-5600.
- Said, N., Bishara, T., García-Maraver, A., & Zamorano, M. (2013). Effect of water washing on the thermal behavior of rice straw. *Waste Management*, 33(11), 2250-2256.
- Shen, J., Zhu, S., Liu, X., Zhang, H., & Tan, J. (2012). Measurement of heating value of rice husk by using oxygen bomb calorimeter with benzoic acid as combustion adjuvant. *Energy Procedia*, 17, 208-213.
- Skrifvars, B. J., Yrjas, P., Kinni, J., Siefen, P., & Hupa, M. (2005). The fouling behavior of rice husk ash in fluidized-bed combustion. 1. Fuel characteristics. *Energy & fuels*, 19(4), 1503-1511.
- Sommersacher, P., Brunner, T., Obernberger, I., Kienzl, N., & Kanzian, W. (2013). Application of novel and advanced fuel characterization tools for the combustion related characterization of different wood/kaolin and straw/kaolin mixtures. *Energy & fuels*, 27(9), 5192-5206.
- Trinh, T. N., Jensen, P. A., Dam-Johansen, K., Knudsen, N. O., Sørensen, H. R., & Hvilsted, S. (2013). Comparison of lignin, macroalgae, wood, and straw fast pyrolysis. *Energy & Fuels*, 27(3), 1399-1409.
- Tumuluru, J. S., Wright, C. T., Boardman, R. D., & Kremer, T. (2012). Proximate and ultimate compositional changes in corn stover during torrefaction using thermogravimetric analyzer and microwaves. In *2012 Dallas, Texas, July 29-August 1, 2012* (p. 1). American Society of Agricultural and Biological Engineers.
- Van Hung, N., Maguyon-Detras, M. C., Migo, M. V., Quilloy, R., Balingbing, C., Chivenge, P., & Gummert, M. (2020). Rice straw overview: availability, properties, and management practices. *Sustainable Rice Straw Management*, 1.

- Wang, X., Hu, Z., Adeosun, A., Liu, B., Ruan, R., Li, S., & Tan, H. (2018). Particulate matter emission and K/S/Cl transformation during biomass combustion in an entrained flow reactor. *Journal of the Energy Institute*, 91(6), 835-844.
- Xiong, S., Burvall, J., ORberg, H., Kalen, G., Thyrel, M., Ohman, M., & Bostroöm, D. (2008). Slagging characteristics during combustion of corn stovers with and without kaolin and calcite. *Energy & fuels*, 22(5), 3465-3470.
- Xue, Z., Zhong, Z., & Lai, X. (2020). Investigation on gaseous pollutants emissions during co-combustion of coal and wheat straw in a fluidized bed combustor. *Chemosphere*, 240, 124853.
- Xue, Z., Zhong, Z., Zhang, B., Zhang, J., & Xie, X. (2017). Potassium transfer characteristics during co-combustion of rice straw and coal. *Applied Thermal Engineering*, 124, 1418-1424.
- Yang, W., Zhu, Y., Cheng, W., Sang, H., Yang, H., & Chen, H. (2017). Characteristics of particulate matter emitted from agricultural biomass combustion. *Energy & Fuels*, 31(7), 7493-7501.
- Yin, C. Y. (2011). Prediction of higher heating values of biomass from proximate and ultimate analyses. *Fuel*, 90(3), 1128-1132.
- Zhang, D., Wang, F., Shen, X., Yi, W., Li, Z., Li, Y., & Tian, C. (2018). Comparison study on fuel properties of hydrochars produced from corn stalk and corn stalk digestate. *Energy*, 165, 527-536.
- Zhang, Y., Ghaly, A. E., & Li, B. (2014). Influences of Physical and Thermochemical Properties on the Exergy of Cereal Straws. *J Fundam Renewable Energy Appl*, 4(134), 2.
- Zhang, Z. H., Song, Q., Yao, Q., & Yang, R. M. (2012). Influence of the atmosphere on the transformation of alkali and alkaline earth metallic species during rice straw thermal conversion. *Energy & fuels*, 26(3), 1892-1899.
